# Supplementary material for: Lipid- and gut microbiota-modulating effects of graphene oxide nanoparticles in high-fat diet-induced hyperlipidemic mice
Source: Royal Society of Chemistry journal article supplement (doi:10.1039/c8ra06058d), 2018-01-01
Supplement: c8ra06058d1.pdf [file c8ra06058d1.pdf]

Electronic Supplementary Information

# **Lipid- and Gut Microbiota-modulating Effects of Graphene Oxide Nanoparticles in High-fat Diet-induced Hyperlipidemic Mice**

Juan Li<sup>1</sup>, Shengmei Yang<sup>1</sup>, Jiaqi Yu<sup>3</sup>, Rongli Cui<sup>1</sup>, Ru Liu<sup>1</sup>, Runhong Lei<sup>1</sup>, Yanan Chang<sup>1</sup>,  
Huan Geng<sup>1</sup>, Yanxia Qin<sup>1</sup>, Weihong Gu<sup>1</sup>, Shibo Xia<sup>1</sup>, Kui Chen<sup>1</sup>, Jianglong Kong<sup>1</sup>,  
Guogang Chen<sup>\*2</sup>, Chongming Wu<sup>\*3</sup>, Gengmei Xing<sup>\*1</sup>

1. CAS Key Laboratory for Biomedical Effects of Nanomaterial & Nanosafety, Institute of High Energy Physics, Chinese Academy of Science (CAS), Beijing 100049, China

2. College of Food Science, Shihezi University, Shihezi 832000, China

3. Pharmacology and Toxicology Research Center, Institute of Medicinal Plant Development, Chinese Academy of Medical Sciences & Peking Union Medical College, Beijing 100193, China

Table S1. Oligonucleotide primers used in this work

| Targets                              | Primers     | Sequence (5'-3')          |
|--------------------------------------|-------------|---------------------------|
| All bacteria                         | Uni331 modF | TCCTACGGGAGGCAGCAGTG      |
|                                      | E533 modR   | TTACCGCGGCTGCTGGCACG      |
| Clostridium<br>cluster IV            | Sg-Clept-F  | GCACAAGCAGTGGAGT          |
|                                      | Sg-Clept-R3 | CTTCCTCCGTTTTGTCAA        |
| Costridium<br>cluster XIVa           | Erec 482 F  | CGGTACCTGACTAAGAAGC       |
|                                      | Erec 688 R  | GTCCTCCTAATATCTACGC       |
| Allobaculum<br>muciniphila           | Allo-F      | ACCTGCGGTGCATTAGYTGG      |
|                                      | Allo-R      | GCATYGCTCGTTCAGGCTTGC     |
| Butyryl<br>coenzyme A<br>transferase | BcoA-F      | GYTNGGHATYGGYGGHATGC      |
|                                      | BcoA-R      | CCTGCCTTTGCAATRTCACRAANGC |
| Butyrate kinase                      | Buk-F       | TGYWDKHGTWGGHMGWGGYG      |
|                                      | Buk-R       | TCATCTRYAACWACHGGRTCY     |

Samples

X4

X10

X20

X40

duodenal

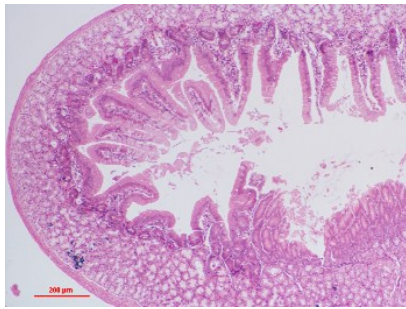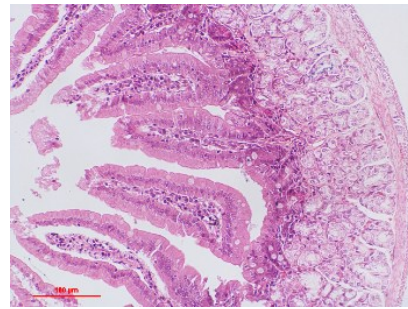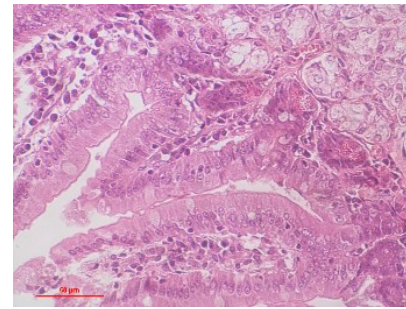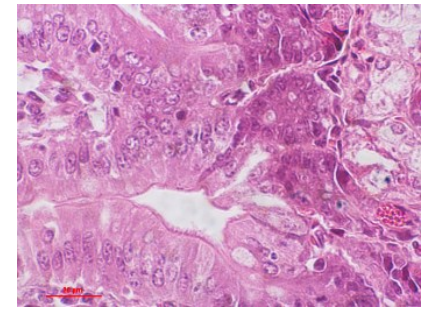

jejunum

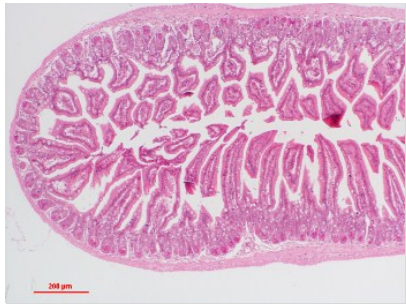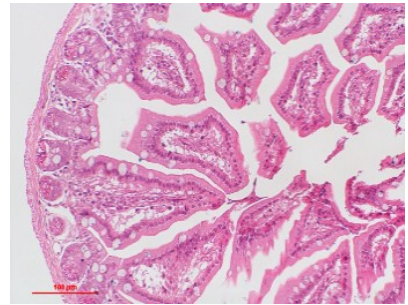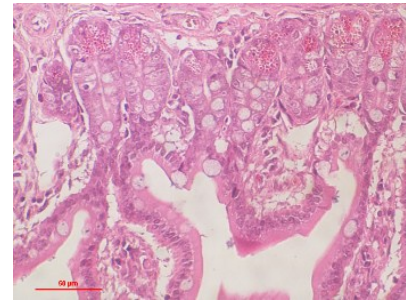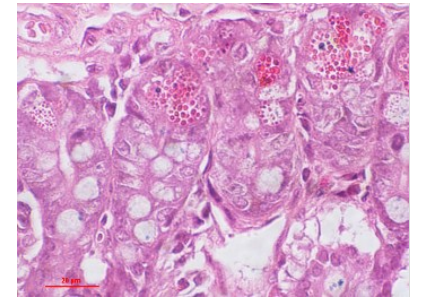

ileum

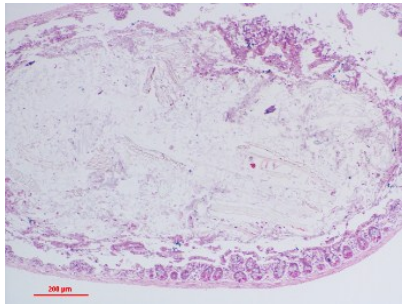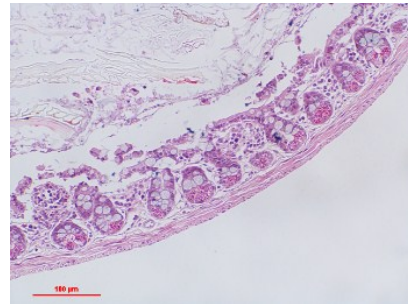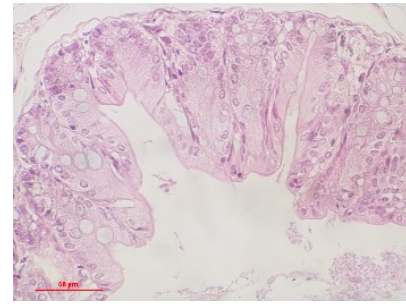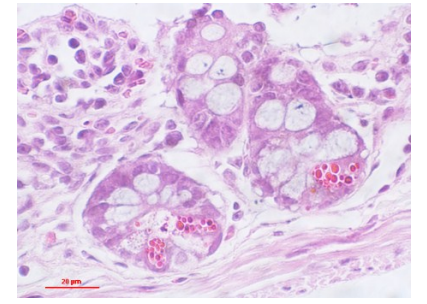

cecum

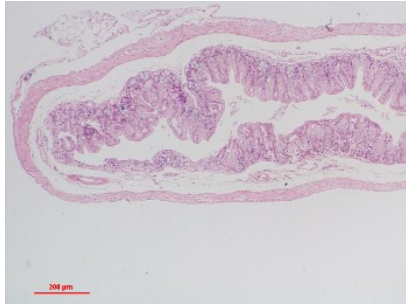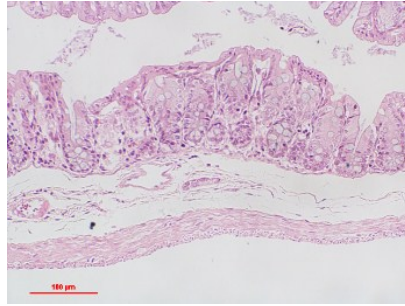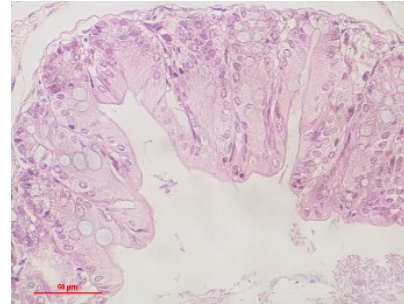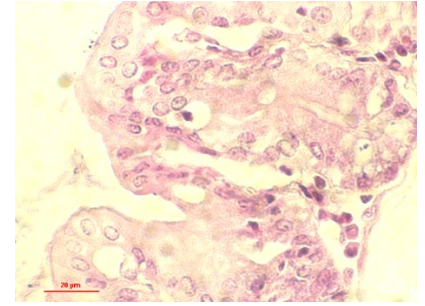

Figure S1 Histopathology of gastrointestinal tissue. The pictures in the first line were for duodenal. The pictures in second line were for jejunum. The pictures in the third line were ileum and the picture in the fourth line were for cecum. The scale bars were 200 $\mu$ m in the pictures magnified 4 times. The scale bars were 100 $\mu$ m in the pictures magnified 10 times. The scale bars were 50 $\mu$ m in the pictures magnified 20 times. The scale bars were 20 $\mu$ m in the pictures magnified 40 times.
